# Supplementary material
Source: Springer Nature journal article supplement (https://www.springermedizin.de/resource/supplementary/12885_2013_4431_MOESM6_ESM.pdf/9466432)

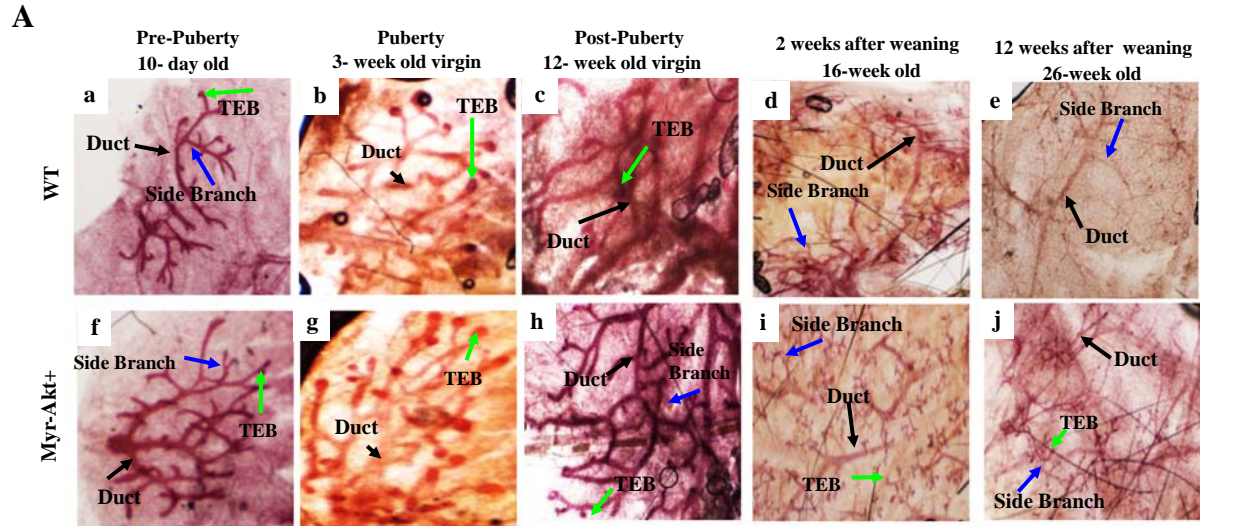

**B** Enlarged example of mammary gland from 26- week old Myr-Akt1+

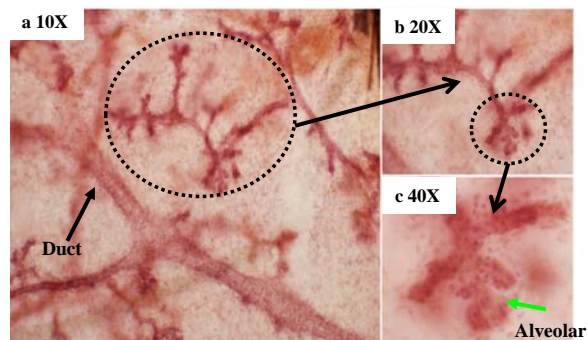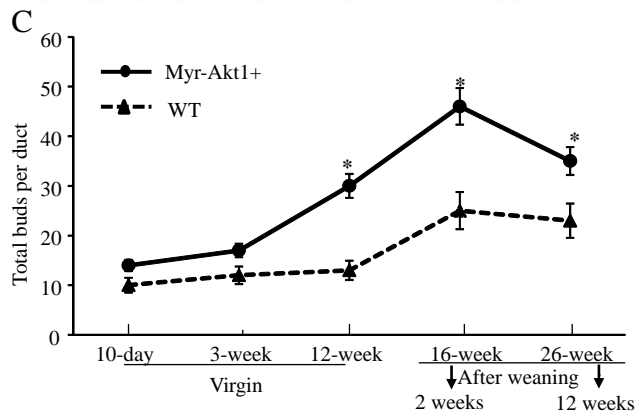

Supplement: MOESM6 [file 9466432]
